# Supplementary material for: Characteristics of ocean mesoscale eddies in the Canadian Basin from a high resolution pan-Arctic model
Source: Copernicus journal article supplement (doi:10.5194/egusphere-2025-3527), 2025-07-30
Supplement: Supplementary file [file egusphere-2025-3527-AC3-supplement.pdf]

# **Authors responses to reviewer #1 comments**

## **Characteristics of ocean mesoscale eddies in the Canadian Basin from a high resolution pan-Arctic model**

Noémie Planat, Carolina O. Dufour, Camille Lique, Jan K. Rieck, Claude  
Talandier, L. Bruno Tremblay

**Manuscript Reference Number: 2025-3527**

Date: November 25th, 2025

In the following, all page numbers refer to the revised manuscript.

## General comments

**Reviewer:** This paper uses a 1/12 degree ocean general circulation model to studies the statistics of ocean mesoscale eddies in the Beaufort gyre of the Arctic Ocean. The authors focus on the period 1995-2020. The authors show strong regional and temporal variability. There is strong linkage with the sea ice cover, while the seasonality of the eddies is weaker during the pycnocline. The authors find, that except along the Chukchi shelf break, that most eddies have little to no temperature signal. The eddies in the upper layer increase with time over the simulation. The authors also suggest that the results from ITPs that suggest most Beaufort Gyre eddies are anti-cyclonic may be due to sampling bias.

This is an interesting paper, well worth publishing. And appropriate for Ocean Science. That said, there are ways the manuscript could be improved and I would suggest major revisions. Detailed justification is provided below.

**Authors:** We thank the reviewer for their detailed review of our manuscript and constructive suggestions which we believe have helped improve the manuscript. Below, we address all the concerns raised by the reviewer and indicate the changes made to the manuscript.

---

## Major comments

**Reviewer:** Is a 1/12 degree model really high resolution? Many models of higher resolution now exist – for example there are papers that look at eddies at 1/60 degree in simulations of the Arctic Ocean, Nordic Seas and the Labrador Sea, for example. The advantage of a 1/12 degree simulation is the length of integration for the analysis. So, as long as the given resolution is able to resolve a significant part of the eddy spectrum at the given resolution, I can understand the authors using the configuration they did. But I'd like to see some more discussion of mesoscale eddies and understand how they are represented in CREG12.

Given the model's stratification, could the authors provide information on where the Rossby Radius is resolved and with how many grid cells, especially at the margins of the Beaufort Gyre.

**Authors:** We are well aware of the limitations of the 1/12 degree resolution. The choice of the model was motivated by the goal of the paper to investigate the evolution of the number of eddies over the last decades that have seen the most drastic changes in the sea ice state and circulation. The relatively long period of integration of the model not only allows for this investigation but also for a longer period of equilibration of the solution than that performed with fully eddy-resolving models. While the model only resolves the larger part of the mesoscale spectrum, this part has been shown to contain most of the kinetic energy [65%

of the EKE is contained in scales larger than 20km, Liu et al., 2024].

The revised manuscript contains the following additions and modifications to clearly state the limitations of the model in terms of resolution of mesoscale eddies and to motivate the choice of resolution :

- *Lines 147-153 (Method) : This relatively fine horizontal grid size allows for an explicit resolution of most of the mesoscale spectrum within the deep basins where the first Rossby radius of deformation  $R_o$  is  $\approx 10 - 15$  km, but not over the continental slope and shelf where  $R_o < 7$  km [Nurser and Bacon, 2013, see also Fig. S1]. Higher resolution simulations of the Arctic Ocean ( $\approx 1$  km) have shown that the EKE spectrum peaks around 50 km [Li et al., 2024] and that more than 80% (resp. 65%) of the EKE is contained in scales larger than 10 km [resp. 20 km; Liu et al., 2024]. Therefore, we argue that  $1/12^\circ$  is a resolution fine enough to represent most of the mesoscale features in the Beaufort Gyre and along its margins (but not over the shelves), while it runs at a cost that allows for decadal integration.*
- **Supplementary materials :** A figure (S1) showing the ratio of the first Rossby radius of deformation  $Ro$  to the model grid spacing  $dx$  is shown (as required by one of the reviewers). It shows that the BG area is resolved with  $Ro/dx = 3$  and the Makarov Basin with  $Ro/dx = 2.5$ . It also shows that the shelves are resolved with  $Ro/dx \leq 1$ .
- **Discussion :** It is now clearly acknowledged that any direct and quantitative comparison with observations is limited by the model resolution that is not high enough to resolve the very small eddies detected by e.g. ITPs (down to 3 km).  
*Lines 608-611 : Yet, a proper and detailed comparison with observations would require using a model at higher-resolution given that most features identified with moorings, ITPs or satellite fall between the meso- and the submeso-scales. Such a comparison would also benefit from an adequate model subsampling, through an Observing System Simulation Experiments, to take into account the observations sampling biases.*

**Reviewer:** And if the motivation to use  $1/12$  degree is the longer timeseries, this needs to be discussed.

**Authors:** Our motivation is to detect eddies over the few decades that include the major changes in the sea ice and in the ocean circulation that have occurred in the Canada Basin. As mentioned above, this is feasible at the expense of the resolution. We have rewritten the introduction to emphasize this goal, and reorganised the result section to highlight the temporal changes with a dedicated subsection.

**Reviewer:** As well, some discussion of what is found at higher resolution is needed to provide the reader with confidence with respect to their results at the given resolution.

**Authors:** To our knowledge, analyses of energetics of the Beaufort Gyre in realistic higher resolution models have been only done at  $\approx 1$  km in the FESOM model. We now refer to both Li et al. [2024] and Liu et al. [2024] in the method section, who show that most of the energy spectrum is at scales larger than 20 km in their model.

*Lines 149-151 : Higher resolution simulations of the Arctic Ocean ( $\approx 1$  km) have shown that the EKE spectrum peaks around 50 km [Li et al., 2024] and that more than 80% (resp. 65%) of the EKE is contained in scales larger than 10 km [resp. 20 km; Liu et al., 2024].*

**Reviewer:** I'm trying to understand what the authors' number of eddies mean. The paper states about 6,250 eddies are detected per year and per depth level. That seems like a huge number. First off, I understand the authors point about the difficulty in determining the vertical coherence of the eddies. And the authors do show some changes with depth. But just saying per depth level makes it seem like there are significantly more eddies that there actually are – given most eddies are likely found through multiple levels. It might be better to average numbers over several levels and then state there are on average X eddies detected per year above pycnocline, Y in the pycnocline and Z below it (or using some other depth metric).

**Authors:** Indeed, 6250 appears like a large number. To obtain this number, we average over all 26 years of simulation and across all depth levels. While this is a gross estimate, this resulting number does account for the fact that eddies might span several depth levels. We have followed the recommendation of the reviewer and now report the number of eddies per layer in the abstract :

*Lines 4-6 : Over that period, about 6000 eddies per year are detected in the surface layer, while about 9000 eddies per year are detected in the pycnocline layer, and about 5500 eddies per year in the Atlantic Waters (AW) layer.*

As well as in the whole manuscript.

**Reviewer:** Additionally, how many eddy exist per day, on average (i.e. a timeseries by day through the mean seasonal cycle)? I wonder if the large yearly number is because of the short duration of the eddies being a function of them being lost by the tracking software, then re-found and thus recounted as a new eddy. A median duration of 4 days is short! Or if the eddies are being damped quickly given the setting at the given model resolution? If I look at figure 3c, I don't see that many eddies on the given day (with generally very short trajectories), so I am wanting more discussion of this, to help understand what that large

eddy number the paper provides really means.

**Authors:** The number of eddies detected every day across the Canadian Basin over the first 5 years of the simulation is shown at 70 m on Fig. I. On average, our algorithm detects 85000 eddies per year (including features that last only one day and that we filter in the analysis of the paper). We agree with the reviewer that the number of eddies is likely overestimated, although satellite-base detections have reported  $\mathcal{O}(1000)$  eddies with surface signatures in the seasonal ice-free regions and MIZ [Kozlov et al., 2019, Kubryakov et al., 2021, Manucharyan et al., 2022]. At subsurface, however, eddy counts have relied on moorings and ITPs, and are thus probably underestimated. This comparison now appears at the beginning of the results section :

*Lines 311-313 : This large number opposes the very few vortices detected from in-situ observations below the ice [ $\mathcal{O}(10)$  eddies per year, Cassianides et al., 2023, Zhao et al., 2014]. It is, however, closer to numbers reported from satellite observations in the Marginal Ice Zone or the Open Ocean [up to  $\mathcal{O}(1000)$  eddies per year, Kubryakov et al., 2021, Kozlov et al., 2019, Manucharyan et al., 2022].*

This being said, we believe that 6000 eddies per year is overestimated, especially considering the dominance of short features. We attribute this overestimation to (i) the tracking procedure losing track of some eddies and (ii) dissipation of eddy energy in the model, with both impacting the eddy lifetime.

The algorithm may lose track of the weakest features, or of eddies splitting/merging. However, relaxing some parameters in the algorithm to better identify and thus track weak eddies may lead to the detection of spurious features. There is thus a trade-off between keeping track of weak eddies and including spurious features. This issue is faced by all eddy tracking algorithms, and sensitivity tests were performed (see Section 2.2). In the final configuration, Figure 5 shows that the algorithm can successfully keep track of individual eddies along their lifetime as expected, failing sometimes along their upper and lower boundaries, where the eddies are likely weaker. This figure have been included in the revised manuscript and discussed in section 3.1.1.

A quantification of the low bias due to the tracking algorithm is difficult and not attempted here. We still argue that part of the short eddies detected are likely real, short lasting, rotating vortices that are evanescent by nature in the model.

Among these short features, part can be attributed to the viscosity and energy level of the model that may differ from the reality and dissipate eddies too quickly. However, we also note that the short lifetime of eddies (few days) in the upper layer is consistent with the theoretical

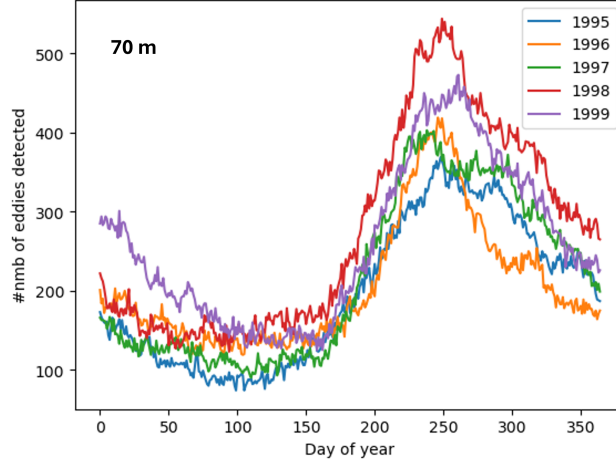

Figure I: Seasonal cycle of the number of eddies detected per day for the five first years of the dataset at 70 m depth.

spindown time scale of eddies in layers affected by sea ice which was suggested by Meneghello et al. [2021] [based on results from Pedlosky, 1982]). At depth, eddies are expected to live longer (months to years), an increase in lifetime that is captured by our algorithm to a smaller extent (Figure 6e). The signature of subsurface and deep eddies is weaker than that of near-surface eddies which may be the reason why the algorithm may occasionally lose track of eddies especially at depth. Whether these weak vortices at depth are accurately reproducing real features [e.g. as suggested by Manucharyan and Stewart, 2022, from the stirring of PV gradients in the interior] or should be attributed to the weak energy level of the model (see Section 2.1.2) is difficult to assess. We have extended the discussion around the turbulent soup to include the above mentioned arguments (see below).

**Reviewer:** The author’s do bring up the idea of turbulent soup, which I like – but I still feels this topic does need more to help the reader understand what the results mean.

**Authors:** We thank the reviewer for bringing up this point. Following the discussion above, we have extended the discussion on the turbulent soup and suggested a few hypotheses for the origin of this “soup”:

*Lines 613-624 : When separating between short and long-lasting eddies based on their duration being respectively shorter or longer than their turnaround time, we find that the bulk of the eddy dataset consists of short-lasting eddies which we refer to as a “turbulent soup”. Within this ephemeral eddy population, it is likely that some short features are artefact of the tracking algorithm, that may lose track of the weakest eddies, or of eddies splitting/merging. The OW detection algorithm is known to be biased towards weak eddies. Yet, most of the features are likely actual, short-lasting eddies that are evanescent by nature. Within the upper layer, the*

*very short lifetime of these eddies could be attributed to the presence of sea ice [spindown time scale of eddies due to ice friction is estimated around 4 days Meneghello et al., 2021]. At depth, weak vortices have been suggested to form from the stirring of interior PV gradients [Manucharyan and Stewart, 2022]. Alternatively, weak eddies may arise from the relatively low EKE in our model due to its resolution (Sect. 2). Overall, these relatively weak and short-lasting eddies that form a turbulent soup are not captured by observational dataset, which may explain some of the important differences found between our census and the observation-based literature. Nonetheless, these eddies may play an important role in the transfer of energy, and we leave for future analysis to quantify their integrated role in the penetration of heat, salt and nutrients into the deep basin.*

**Reviewer:** The authors talk about no temperature signal – what about salinity? The eddies like play an important role in freshwater exchange into and out of the gyre. This would be good to further explore.

**Authors:** The eddy population that we have detected shows little anomalies for both temperature and salinity as shown in Fig. 4e and f. This appears consistent with previous observational studies [Cassianides et al., 2023]. When looking at long-lasting eddies only though, we do see some individuals with larger temperature anomalies. The main reason why the salinity anomalies are not extensively discussed in the discussion of the long eddies (and associated heat transport) is because the salinity anomalies are much smaller than the temperature anomalies and do not display any spatial pattern (see supplementary S14, see also the scatter plot below with long eddy salinity anomalies at 4 different depths, Fig. II). As suggested in the discussion, it is possible that the cumulative effect of these eddies with little anomalies is important for the equilibrium of the gyre. However, to properly quantify their role in the freshwater exchange across the gyre, and asses their relative importance compared to transient but not circular features (e.g. filaments, fronts), one should quantify their FW transport, which we cannot properly do with this approach.

The abstract now also mention the absence of salinity anomalies on average :

*Lines 14-19 : The vast majority of eddies have no temperature nor salinity signature with respect to their environment, although a significant portion of long-lived eddies, located along the Chukchi shelf break, have a non-negligible temperature anomaly and penetrate into the Beaufort Gyre, thus suggesting a mechanism for the penetration of heat into the gyre.*

**Reviewer:** Strong increase in 2008 – BG spin-up and/or low ice year?

**Authors:** We think that it is likely a mix of the two, at least in the surface layer, and we have rephrased accordingly :

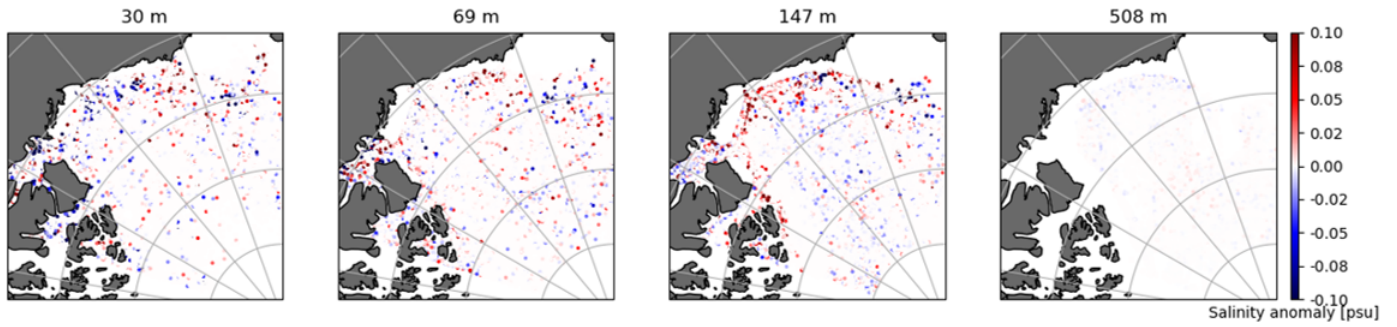

Figure II: Salinity anomalies of long lasting eddies at 30, 69, 147 and 508 m.

*Lines 525-527 : The increase in the number of eddies that peaks in 2008 in our model bears similarity to the EKE increase that was reported by Regan et al. [2020] to occur over one year following the gyre acceleration in 2007 and low sea ice record of that year.*

**Reviewer:** I have some technical questions about the model configuration and experiment. What does constraining the model to \*about\* 1.4 Sv at Bering Strait mean? A constant value with time? Constant annual mean? An annual mean of 1.4 Sv with interannual variability? Additionally, this value seems a bit large compared to the observations.

**Authors:** The 2 boundaries are forced using the output of the GLORYS12V1 reanalysis. From 1979 to 1992, a daily climatology of volume transport computed over years 1993 to 2020 of the reanalysis is applied (due to a lack of model output prior to 1993), then between 1993 and 2020, the daily volume transport of the reanalysis is used to force the boundary of our model.

We thank the reviewer for pointing out the error in the manuscript : the mean transport output from GLORYS12V1 is about 1.4 Sv and has been corrected to match observations estimates from Woodgate [2018] who give a transport of about 1.1 Sv. The wording in the text has been corrected as follows :

*Lines 167-168 : At Bering Strait, meridional velocities are adjusted to constrain the inflow to about 1.1 Sv, matching observation estimates [Woodgate, 2018].*

An updated DOI for the documentation of the run is also available : Talandier and Lique [2024]

**Reviewer:** As well, does the model consider the increase in recent years suggested with the observations? As well, what are the heat and freshwater transports, and how do they compare with the observations?

**Authors:** We show on Fig. III a comparison of volume (upper row), heat (middle row)



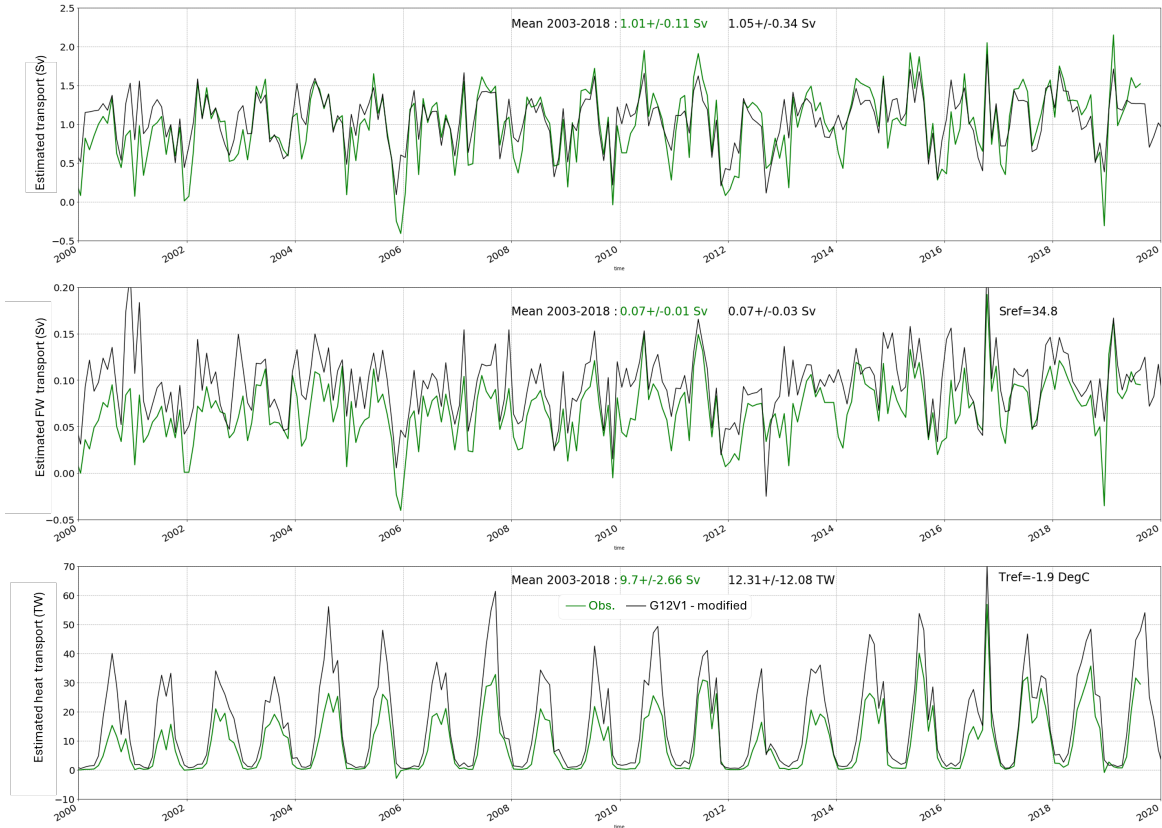

Figure III: Estimated transport (first line), fresh water transport (second line) and heat transport (last line) at Bering Strait from observations [green, Woodgate, 2018] and modified from Glorys 12 to correct the volumine influx (black).

and salt fluxes (lower row) through Bering Strait between Woodgate et al. 2018 (green) and CREG12 (black). All three variables show changes of similar amplitude at seasonal and interannual time scales.

**Reviewer:** The river runoff I think needs to be better explained. I thought the Stadnyk et al. paper mentioned uses the AHYPE model? And wasn't the output from that model used in Weiss-Gibbons et al., 2025? And in either case, I don't believe the AHYPE output provided Greenland discharge? Are you sure that didn't come from a different product?

**Authors:** The reviewer is right in mentioning this new reference : Weiss-Gibbons et al. [2024]. The runoff as well as the Greenland discharge data sets that the reviewer mentions are exactly the ones that have been used to force CREG12. It is now corrected in the manuscript and in the updated documentation of the run : Talandier and Lique [2024].

**Reviewer:** Given the importance of the sea-ice in setting the seasonal cycle of the eddies, more on the model representation of sea-ice would be useful. What does comparable to that

derived from satellite observations mean in practice? Especially given that the authors use ERA5 for forcing, which has a known warm bias in the Arctic. So I'm curious about what parameter set for SI3 was able to allow the simulation to get sea ice fields close to the satellite observations.

**Authors:** Some sea ice parameters have been adjusted to compensate the warm bias of ERA5, including the snow conductivity that is set to 0.5 W/m/K, the ice ocean drag coefficient that is set to 7e-3, and the atmosphere-ocean coefficient that is set to 1.2e-3. Ice strength is set to 2e-4 N/m<sup>2</sup>. These parameters are now mentioned in the Method section of the revised paper where the model is described (Section 2.1.1).

In addition, we have extended the validation of the model, with two additional figures that provide a comparison of sea ice extent and thickness between the model, satellite observations, and PIOMAS.

*Lines 176-185 : Over the period of analysis, the mean September sea ice concentration is comparable to that derived from satellite observations with small differences on the Eurasian shelf and a low bias in the western CB (Fig. 1a,b). On average across the Arctic and along the simulation, the sea ice extent deviates from that derived from satellite observations by -7% in September and -16% in March. When compared to the PIOMAS Arctic Sea Ice Volume Reanalysis [Zhang and Rothrock, 2003], the sea ice thickness is 35 cm thinner in September and 20 cm thinner in March (Fig. S2b, S3b). The interannual variability of sea ice extent is well captured by the model across the 26 years of simulation. A strong decline in sea ice starting around 2000 and persisting in time appears in the model in agreement with observations (see Fig. S2c, S3c in supplementary). The corresponding location of ice loss is generally well represented despite some biases in the ice concentration along the Eurasian shelf in summer and high biases along Yermack plateau and Greenland eastern shelf in winter (see Fig. S2a,b, S3a,b in supplementary).*

**Reviewer:** Given the discussion of the three main water masses, I would also be curious to see a time series of salinity (or freshwater content) in the model, compared to the Beaufort Gyre Experiment results. Especially since Rosenblum et al. has pointed out that many models under-estimate the freshwater content in the region.

**Authors:** We have added a figure comparing the fresh water content of the model to that computed from observations Proshutinsky et al. [2019] to the supplementary materials of the revised manuscript (Fig. S4). The associated text appears in the model validation section :

*Lines 194-196 : The overall fresh water content, referenced to 34.8 psu, shows a strong increase between 2003-2009 in the Canadian Basin as documented from the Beaufort Gyre Exploration Project [Proshutinsky et al., 2009] followed by a plateau (see Fig. S4 in supple-*

mentary).

**Reviewer:** Also, why use fixed depth layers for the vertical splitting, instead of isopycnals (or isohalines) to define the different water masses?

**Authors:** We used fixed depth layers as it provides a simple framework to use across the domain. In particular, where the isopycnals are tilted or even outcrop over the slope and shelf break, fixed depth layers guarantee that there is no averaging done between regions in contact with sea ice and those away from the sea ice influence; this would otherwise complicate the interpretation of the results. Additionally, a given isopycnal boundary may not allow us to delimit the same water mass across the whole domain. That being said, we agree with the reviewer that isopycnal layers are a natural and somewhat more physically grounded framework than depth layers. The two frameworks are likely equivalent within the BG where isopycnals are relatively flat but may provide significantly different pictures at the edge. We now acknowledge this difference in the method/discussion section:

*Lines 560-569 : It is important to note that the definition of the three layers relies on the statistical properties of the whole eddy field over 26 years and hence does not account for temporal variability of the mean circulation, the location of the gyre, and the mean isopycnal depths and slopes. Thus, the depths used as delimiters of the three layers do not necessarily correspond to the actual, instantaneous pycnoclines that they are assumed to represent at all times. This is particularly true where the isopycnal surfaces are strongly tilted or even outcrop over the slope and the shelf break. There, fixed depth layers ensure that there is no averaging done between regions in contact with sea ice and those away from the sea ice influence that would otherwise complicate the interpretation of the results. The results presented in this study, and in particular the spatial structure of the eddy properties and their temporal variability, remain consistent when slightly varying the layers' upper and lower boundaries indicating the robustness of the key features reported for the three layers especially in the centre of the BG where the isopycnals are relatively flat.*

**Reviewer:** Finally, given the authors look at changes with time, as the amount of sea ice is being reduced, can the authors speculate about what their results may mean for the future. And discuss the implications for those potential changes.

**Authors:** Following the reviewer's suggestion, we have added a discussion on future changes to Sect. 3.2 and in the concluding remarks of the paper :

- *Lines 513-517 (Sect. 3.2) : Overall, our results suggest that, in the upper layer, the number of eddies do not only increase because of an expansion of the open ocean area at the expense of sea ice, but also because of an energy surplus in the Canadian Basin in the*

*MIZ and open ocean, in line with conclusions from other modelling studies [e.g., Rieck et al., 2025]. The increase of energy below the pack ice, suggested in future projections of the Arctic [Rieck et al., 2025], is only seen in the upper mixed layer in the current climate.*

- *Lines 583-587 (Discussion): We argue that the higher density in the eddy population is the result of an increasing penetration of energy in the upper layers of the basin where the ice concentration is small enough. Therefore, in the MIZ and open ocean, these results confirm findings from Rieck et al. [2025] of an increased energy input associated to more energy conversion toward EKE, and from Li et al. [2024] who associate this increased EKE to higher baroclinic instabilities, despite increased eddy killing with more mobile ice, in simulations of the future Arctic.*

**Reviewer:** End the discussion with more discussion on the limitations of the model and the present study.

**Authors:** We have edited the discussion to include more on the limitation of the model and of the study as per the reviewer’s suggestion:

- Extended discussion on limitations associated to the detection and tracking algorithm, see above, and lines 613-617.
- Discussion on the possible biases associated to the slightly weak EKE in the model, see above and lines 617-622.
- Limited comparison with observations due to the horizontal and vertical resolution, see above and lines 608-611.
- The absence of 3D reconstruction is now mentioned in Sect. 2 (method) and in Sect. 3.1 (Results): *Lines 243-246 : No 3D representation of eddies is attempted here as connecting the results between the vertical layers is not trivial, and would require a substantial development of the detection and tracking algorithms. A brief evaluation of the vertical structure of eddies is however proposed in Section 3.1.*

---

## Minor comments

**Reviewer:** Line 19 – The increase in the AW layer is over what time period?

**Authors:** We now mention in the text: “*over the 26 years of the simulation*”

**Reviewer:** Figures 1, 3, 5, 6: Please use discrete color contour intervals to make the figures easier to read. **Authors:** Following the reviewer’s recommendation, it has been done for Fig. 3, 6, 7, 8, and 9. Tests on Fig. 1 did not show a significant improvement of the figure.

**Reviewer:** Figure 2. Could you explain in more detail how the anomalies are calculated, rather than just saying similarly from monthly mean anomalies.

**Authors:** The caption now reads :

*Super-imposed are mooring-based estimates of EKE from von Appen et al. [2022], computed with fourth-order Butterworth filter with 2-day to 30-day cutoffs. The reader is referred to von Appen et al. [2022] for exact calculation method.*

**Reviewer:** Line 333. Is this small decrease significant?

**Authors:** Indeed, this exact number is not really meaningful. The sentence now reads :

*Line 502-503 : Over the 26 years, we find [...] and no change on average below the pack ice (Fig. 10).*

**Reviewer:** L335: Might some of the increase with time be a function of changes in the winds and energy input with time?

**Authors:** We have included more details to the interpretation of this result:

*Line 505-509: In the MIZ and open ocean, the increase in eddy generation is mainly a step increase in 2008 with reduced (shut down) interannual variability in the MIZ (Open Ocean) in the following years. This enhancement in the density of the eddy population presumably results from the additional energy penetrating into the ocean in the recent state of the BG, in light with the current and future projections of Li et al. [2024]. In the open ocean, this accumulation of energy could be attributed to the acceleration of the BG from atmospheric forcings [Giles, 2012], and in the MIZ to a combination of less compacted ice [Martin et al., 2016] or to the thinner ice cover [Mulwijk et al., 2024]. A quantification of these different drivers is beyond the scope of this paper and left for future analysis.*

**Reviewer:** L348. Half more eddies doesn’t read well.

**Authors:** It is now written : 30% more eddies

**Reviewer:** Figure 7 caption. What does gradient of the SSH averaged over the CB mean?

**Authors:** We first compute the gradient of SSH (two dimension vector), then compute its norm pointwise and average it over the CB domain. We reformulate it as :

*[...] norm of the gradient of SSH calculated at every location of the domain and averaged over*

the CB

**Reviewer:** Table 2. Remind people of the layer definitions in the table or caption.

**Authors:** Done.

## References

- Caili Liu, Qiang Wang, Sergey Danilov, Nikolay Koldunov, Vasco Müller, Xinyue Li, Dmitry Sidorenko, and Shaoqing Zhang. Spatial Scales of Kinetic Energy in the Arctic Ocean. *Journal of Geophysical Research: Oceans*, 129(3):e2023JC020013, March 2024. ISSN 2169-9275, 2169-9291. doi: 10.1029/2023JC020013. URL <https://agupubs.onlinelibrary.wiley.com/doi/10.1029/2023JC020013>.
- A. J. G. Nurser and S. Bacon. Arctic Ocean Rossby radius Eddy length scales and the Rossby radius in the Arctic Ocean Arctic Ocean Rossby radius. *Ocean Sci. Discuss*, 10:1807–1831, 2013. ISSN 1807-1831. doi: 10.5194/osd-10-1807-2013. URL [www.ocean-sci-discuss.net/10/1807/2013/](http://www.ocean-sci-discuss.net/10/1807/2013/).
- Xinyue Li, Qiang Wang, Sergey Danilov, Nikolay Koldunov, Caili Liu, Vasco Müller, Dmitry Sidorenko, and Thomas Jung. Eddy activity in the Arctic Ocean projected to surge in a warming world. *Nature Climate Change*, 14(2):156–162, February 2024. ISSN 1758-6798. doi: 10.1038/s41558-023-01908-w. URL <https://www.nature.com/articles/s41558-023-01908-w>. Publisher: Nature Publishing Group.
- Igor E. Kozlov, Anastasia V. Artamonova, Georgy E. Manucharyan, and Arseny A. Kubryakov. Eddies in the Western Arctic Ocean From Spaceborne SAR Observations Over Open Ocean and Marginal Ice Zones. *Journal of Geophysical Research: Oceans*, 124(9):6601–6616, September 2019. ISSN 2169-9275, 2169-9291. doi: 10.1029/2019JC015113. URL <https://agupubs.onlinelibrary.wiley.com/doi/10.1029/2019JC015113>.
- A. A. Kubryakov, I. E. Kozlov, and G. E. Manucharyan. Large Mesoscale Eddies in the Western Arctic Ocean From Satellite Altimetry Measurements. *Journal of Geophysical Research: Oceans*, 126(5):e2020JC016670, May 2021. ISSN 2169-9275, 2169-9291. doi: 10.1029/2020JC016670. URL <https://agupubs.onlinelibrary.wiley.com/doi/10.1029/2020JC016670>.

Georgy E. Manucharyan, Rosalinda Lopez-Acosta, and Monica M. Wilhelmus. Spinning ice floes reveal intensification of mesoscale eddies in the western Arctic Ocean. *Scientific Reports*, 12(1):7070, April 2022. ISSN 2045-2322. doi: 10.1038/s41598-022-10712-z. URL <https://www.nature.com/articles/s41598-022-10712-z>.

Ang lina Cassianides, Camille Lique, Anne-Marie Tr guier, Gianluca Meneghello, and Charly De Marez. Observed Spatio-Temporal Variability of the Eddy-Sea Ice Interactions in the Arctic Basin. *Journal of Geophysical Research: Oceans*, 128(6): e2022JC019469, June 2023. ISSN 2169-9275, 2169-9291. doi: 10.1029/2022JC019469. URL <https://agupubs.onlinelibrary.wiley.com/doi/10.1029/2022JC019469>.

Mengnan Zhao, Mary-Louise Timmermans, Sylvia Cole, Richard Krishfield, Andrey Proshutinsky, and John Toole. Characterizing the eddy field in the Arctic Ocean halocline. *Journal of Geophysical Research: Oceans*, 119(12):8800–8817, December 2014. ISSN 2169-9291. doi: 10.1002/2014JC010488. URL <http://dx.doi.org/10.1002/2014JC010488>.

Gianluca Meneghello, John Marshall, Camille Lique, L Erik Isachsen, Edward Doddridge, Jean-Michel Campin, Heather Regan, and Claude Talandier. Genesis and Decay of Mesoscale Baroclinic Eddies in the Seasonally Ice-Covered Interior Arctic Ocean. *JOURNAL OF PHYSICAL OCEANOGRAPHY*, 51, 2021.

J Pedlosky. *Geophysical Fluid Dynamics*. Springer edition, 1982.

Georgy E. Manucharyan and Andrew L. Stewart. Stirring of interior potential vorticity gradients as a formation mechanism for large subsurface-intensified eddies in the Beaufort Gyre. *Journal of Physical Oceanography*, August 2022. ISSN 0022-3670, 1520-0485. doi: 10.1175/jpo-d-21-0040.1. URL <https://journals.ametsoc.org/view/journals/phoc/aop/JP0-D-21-0040.1/JP0-D-21-0040.1.xml>  
Publisher: American Meteorological Society.

Heather C Regan, Camille Lique, Claude Talandier, and Gianluca Meneghello. Response of Total and Eddy Kinetic Energy to the Recent Spinup of the Beaufort Gyre. *JOURNAL OF PHYSICAL OCEANOGRAPHY*, 50, 2020.

Rebecca A. Woodgate. Increases in the Pacific inflow to the Arctic from 1990 to 2015, and insights into seasonal trends and driving mechanisms from year-round Bering Strait mooring data. *Progress in Oceanography*, 160:124–154, January 2018. ISSN 00796611. doi: 10.1016/j.pocean.2017.12.007. Publisher: Elsevier Ltd.

Claude Talandier and Camille Lique. CREG12.L75-REF12, August 2024. URL <https://doi.org/10.5281/zenodo.17350785>.

- Tahya Weiss-Gibbons, Andrew Tefs, Xianmin Hu, Tricia Stadnyk, and Paul G. Myers. Sensitivity of Simulated Arctic Ocean Salinity and Strait Transport to Interannually Variable Hydrologic Model Based Runoff. *Journal of Geophysical Research: Oceans*, 129(10):e2023JC020536, October 2024. ISSN 2169-9275, 2169-9291. doi: 10.1029/2023JC020536. URL <https://agupubs.onlinelibrary.wiley.com/doi/10.1029/2023JC020536>.
- Jinlun Zhang and D. A. Rothrock. Modeling Global Sea Ice with a Thickness and Enthalpy Distribution Model in Generalized Curvilinear Coordinates. *Monthly Weather Review*, 131(5):845–861, May 2003. ISSN 0027-0644, 1520-0493. doi: 10.1175/1520-0493(2003)131<0845:MGSIIWA>2.0.CO;2. URL [http://journals.ametsoc.org/doi/10.1175/1520-0493\(2003\)131<0845:MGSIIWA>2.0.CO;2](http://journals.ametsoc.org/doi/10.1175/1520-0493(2003)131<0845:MGSIIWA>2.0.CO;2).
- A. Proshutinsky, R. Krishfield, J. M. Toole, M.-L. Timmermans, W. Williams, S. Zimmermann, M. Yamamoto-Kawai, T. W. K. Armitage, D. Dukhovskoy, E. Golubeva, G. E. Manucharyan, G. Platov, E. Watanabe, T. Kikuchi, S. Nishino, M. Itoh, S.-H. Kang, K.-H. Cho, K. Tateyama, and J. Zhao. Analysis of the Beaufort Gyre Freshwater Content in 2003–2018. *Journal of Geophysical Research: Oceans*, 124(12):9658–9689, 2019. ISSN 2169-9291. doi: 10.1029/2019JC015281. URL <https://onlinelibrary.wiley.com/doi/abs/10.1029/2019JC015281>. eprint: <https://agupubs.onlinelibrary.wiley.com/doi/pdf/10.1029/2019JC015281>.
- Andrey Proshutinsky, Richard Krishfield, Mary-Louise Timmermans, John Toole, Eddy Carmack, Fiona McLaughlin, William J Williams, Sarah Zimmermann, Motoyo Itoh, and Koji Shimada. Beaufort Gyre freshwater reservoir: State and variability from observations. 2009.
- J. K. Rieck, J. Martínez Moreno, C. Lique, C. O. Dufour, and C. Talandier. Mean Kinetic Energy and Its Projected Changes Dominate Over Eddy Kinetic Energy in the Arctic Ocean. *Geophysical Research Letters*, 52(22):e2025GL117957, November 2025. ISSN 0094-8276, 1944-8007. doi: 10.1029/2025GL117957. URL <https://agupubs.onlinelibrary.wiley.com/doi/10.1029/2025GL117957>.
- Wilken-Jon von Appen, Till M. Baumann, Markus A Janout, Nikolay V. Koldunov, Yueng-Djern Lenn, Robert S. Pickart, and Qiang Wang. Eddies and the Distribution of Eddy Kinetic Energy in the Arctic Ocean. 35(Special issue on the new arctic ocean):42–51, December 2022.
- Katharine A Giles. Western Arctic Ocean freshwater storage increased by wind-driven spin-up of the Beaufort Gyre. *NATURE GEOSCIENCE*, 5, 2012.



Torge Martin, Michel Tsamados, David Schroeder, and Daniel L. Feltham. The impact of variable sea ice roughness on changes in Arctic Ocean surface stress: A model study. *Journal of Geophysical Research: Oceans*, 121(3):1931–1952, 2016. ISSN 2169-9291. doi: 10.1002/2015JC011186. URL <https://onlinelibrary.wiley.com/doi/abs/10.1002/2015JC011186>. eprint: <https://agupubs.onlinelibrary.wiley.com/doi/pdf/10.1002/2015JC011186>.

Morven Muilwijk, Tore Hattermann, Torge Martin, and Mats A. Granskog. Future sea ice weakening amplifies wind-driven trends in surface stress and Arctic Ocean spin-up. *Nature Communications*, 15(1):6889, August 2024. ISSN 2041-1723. doi: 10.1038/s41467-024-50874-0. URL <https://www.nature.com/articles/s41467-024-50874-0>.
